# Supplementary material for: Studies on effect of Ginkgo biloba L. leaves in acute gout with hyperuricemia model rats by using UPLC-ESI-Q-TOF/MS metabolomic approach
Source: Royal Society of Chemistry journal article supplement (doi:10.1039/c7ra08519b), 2017-01-01
Supplement: c7ra08519b1.pdf [file c7ra08519b1.pdf]

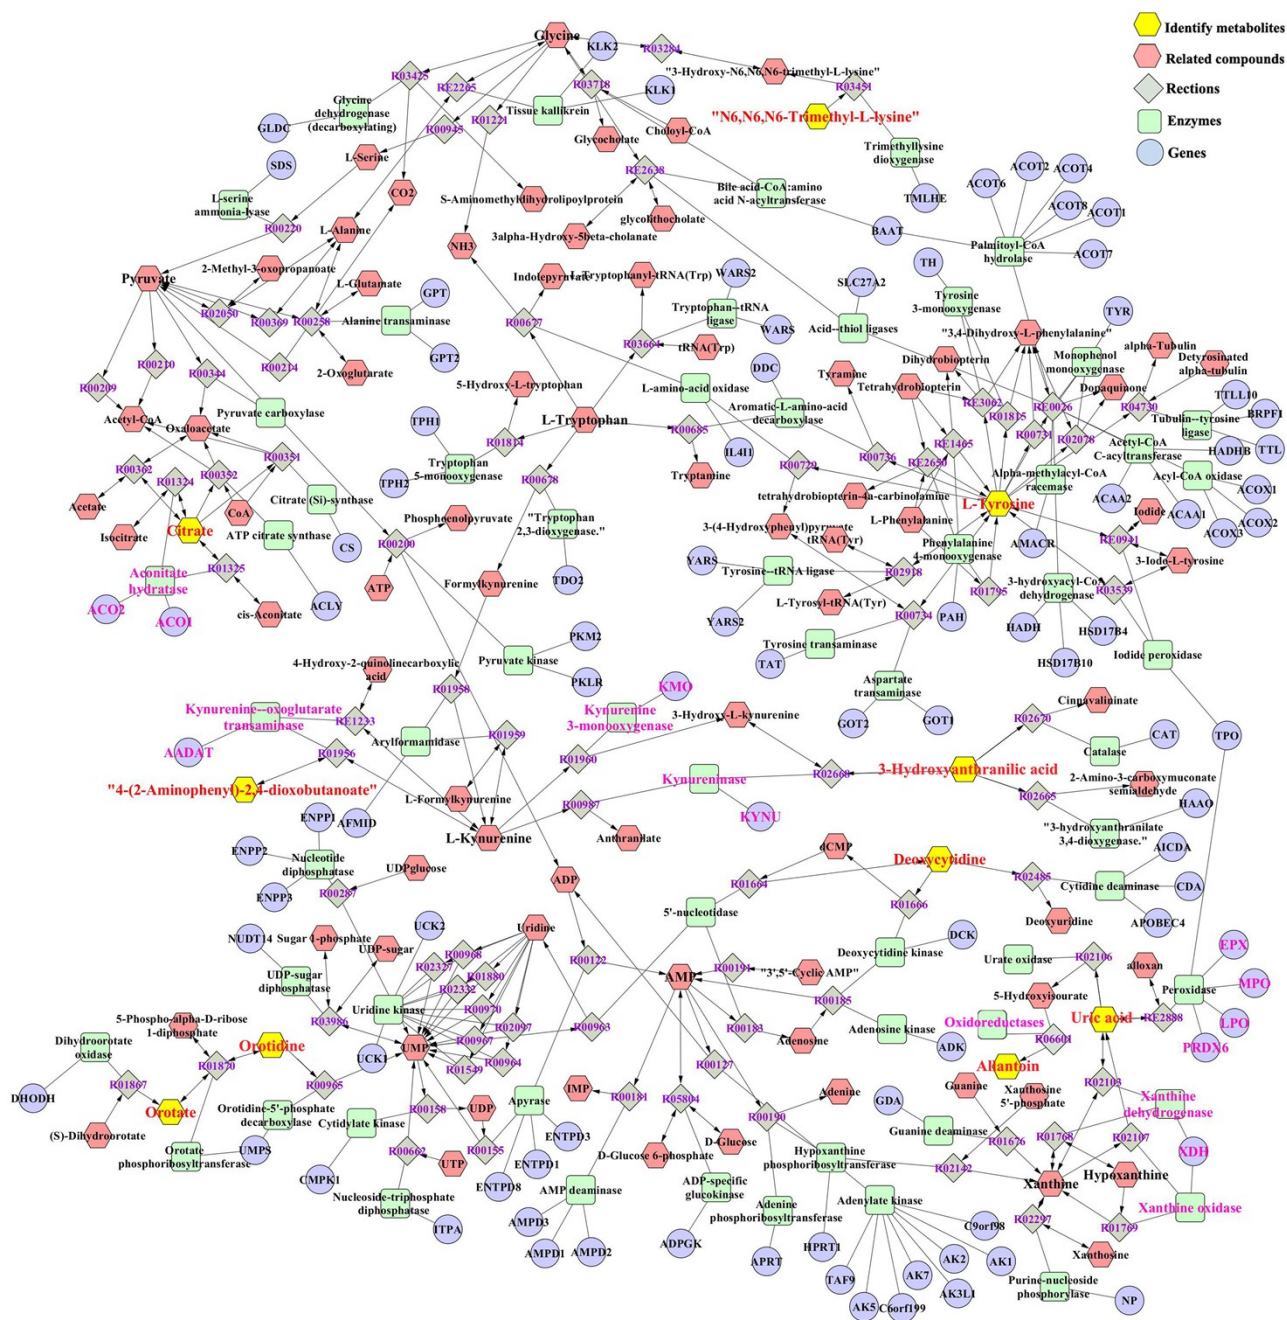

**Fig. S1** Correlation of compounds-reactions-enzymes-genes network of main potential biomarkers by using Metscape.
